26 **Abstract**

27

28 CRISPR knockout screens in hundreds of cancer cell lines have revealed a substantial number  
29 of context-specific essential genes that, when associated with a biomarker such as lineage or  
30 oncogenic mutation, offer candidate tumor-specific vulnerabilities for targeted therapies or novel  
31 drug development. Data-driven analysis of knockout fitness screens also yields many other  
32 functionally coherent modules that show emergent essentiality or, in some cases, the opposite  
33 phenotype of faster proliferation. We develop a systematic approach to classify these  
34 suppressors of proliferation, which are highly enriched for tumor suppressor genes, and define a  
35 network of 103 genes in 22 discrete modules. One surprising module contains several elements  
36 of the glycerolipid biosynthesis pathway and operates exclusively in a subset of AML lines,  
37 which we call Fatty Acid Synthesis/Tumor Suppressor (FASTS) cells. Genetic and biochemical  
38 validation indicates that these cells operate at the limit of their carrying capacity for saturated  
39 fatty acids. Overexpression of saturated acyltransferase *GPAT4* or its regulator *CHP1* confers a  
40 survival advantage in an age-matched cohort of AML patients, indicating the in vitro phenotype  
41 reflects a clinically relevant subtype, and suggesting a previously unrecognized risk in clinical  
42 trials for fatty acid synthesis pathway inhibitors.

43

44

45

## 46 **Introduction**

47

48 Gene knockouts are a fundamental weapon in the geneticist's arsenal, and the discovery of  
49 CRISPR-based genome editing<sup>1</sup> and its adaptation to gene knockout screens has revolutionized  
50 mammalian functional genomics and cancer targeting<sup>2-8</sup>. Hundreds of CRISPR/Cas9 knockout  
51 screens in cancer cell lines have revealed background-specific genetic vulnerabilities<sup>9-13</sup>,  
52 providing guidance for tumor-specific therapies and the development of novel targeted agents.  
53 Although lineage and mutation state are powerful predictors of context-dependent gene  
54 essentiality, variation in cell growth medium and environment can also drive differences in cell  
55 state, particularly among metabolic genes<sup>14,15</sup>, and targeted screening can reveal the genetic  
56 determinants of metabolic pathway buffering<sup>16,17</sup>.

57

58 The presence and composition of metabolic and other functional modules in the cell can also be  
59 inferred by integrative analysis of large numbers of screens. Correlated gene knockout fitness  
60 profiles, measured across hundreds of screens, have been used to infer gene function and the  
61 modular architecture of the human cell<sup>18-21</sup>. Data-driven analysis of correlation networks reveals  
62 clusters of functionally related genes whose emergent essentiality in specific cell backgrounds is  
63 often unexplained by the underlying lineage or mutational landscape<sup>21</sup>. Interestingly, in a recent  
64 study of paralogs whose functional buffering renders them systematically invisible to monogenic  
65 CRISPR knockout screens<sup>22,23</sup>, it was shown that the majority of context-dependent essential  
66 genes are constitutively expressed in cell lines<sup>23</sup>. Collectively these observations suggest that  
67 there is much unexplained variation in the genetic architecture, and emergent vulnerability, of  
68 tumor cells.

69

70 Building human functional interaction networks from correlated gene knockout fitness profiles in  
71 cancer cells is analogous to the yeast functional interaction networks from correlated genetic  
72 interaction profiles<sup>24-27</sup>. The fundamental difference between the two approaches is that, in  
73 yeast, a massive screening of pairwise gene knockouts in a single yeast strain was conducted  
74 in order to measure genetic interaction - a dual knockout phenotype more or less severe than  
75 that expected by the combination of the two genes independently. In coessentiality networks,  
76 CRISPR-mediated single gene knockouts are conducted across a panel of cell lines that sample  
77 the diversity of cancer genotypes and lineages. Digenic perturbations in human cells, a more  
78 faithful replication of the yeast approach, are possible with Cas9 and its variants, but library

79 construction, sequencing, and positional biases can be problematic<sup>16,28–34</sup>. Recently, we showed  
80 that an engineered variant of the Cas12a endonuclease, enCas12a<sup>35</sup>, could efficiently perform  
81 multiplex gene knockouts<sup>34</sup>, and we demonstrated its effectiveness in assaying synthetic  
82 lethality between targeted paralogs<sup>23</sup>. These developments in principle enable researchers to  
83 measure how biological networks vary across backgrounds, a powerful approach for  
84 deciphering complex biology<sup>24,36,37</sup>.

85

86 CRISPR perturbations in human cells can result in loss of function alleles that increase as well  
87 as decrease *in vitro* proliferation rates, an extreme rarity in yeast knockouts. These fast-growers  
88 can complicate predictions of genetic interaction<sup>29</sup> and confound chemoresistance screens<sup>38</sup>.  
89 However, there is no broadly accepted method of classifying these genes from CRISPR  
90 screens. Here we describe the development of a method to systematically identify genes whose  
91 knockout provides a proliferation advantage *in vitro*. We observe that genes which confer  
92 proliferation advantage are typically tumor suppressor genes, and show the same trends of co-  
93 occurrence and functional coherence as the pathways and complexes identified in network  
94 analyses of context-dependent essential genes. Moreover, we discover a novel module that  
95 includes several components of the glycerolipid biosynthesis pathway that slows cell  
96 proliferation in a subset of AML cell lines, and we show a rewired genetic interaction network  
97 using enCas12a multiplex screening, with strong genetic interactions corroborated by clinical  
98 survival data. A putative tumor-suppressive role for glycerolipid biosynthesis is surprising since  
99 this process is thought to be required to generate biomass for tumor cell growth, and may  
100 represent an unanticipated risk factor for pathway inhibitors currently in clinical trials<sup>39,40</sup>.

101

## 102 **Results**

103

### 104 ***Identifying Proliferation Suppressor Signatures***

105

106 We previously observed genes whose knockout leads to overrepresentation in pooled library  
107 knockout screens. These genes, which we term proliferation suppressor (PS) genes, exhibit  
108 positive selection in fitness screens, a phenotype opposite that of essential genes. As expected,  
109 many PS genes are known tumor suppressor genes; for example, *TP53* and related pathway  
110 genes *CDKN1A*, *CHEK2*, and *TP53BP1* show positive selection in select cell lines (**Figure 1a**).  
111 Detection of these genes as outliers is robust to the choice of CRISPR analytical method, as we  
112 tested BAGEL2, CERES, JACKS, and mean log fold change (LFC) (**Supplementary Figure 1a-**

113 **d).** Unlike core-essential genes, PS genes are highly background-specific: *TP53* knockout  
114 shows positive LFC only in cell lines with wild-type *TP53* (**Figure 1b**), and *PTEN* knockout  
115 shows the PS phenotype only in *PTEN<sup>wt</sup>* backgrounds (**Figure 1c**). These observations are  
116 consistent with the role of tumor suppressor genes (TSG) in cell lines: in wildtype cells, TSG  
117 knockout increases the proliferation rate in cell culture, but when cell lines are derived from  
118 tumors where the TSG is already lost, gene knockout has no effect. TSG are therefore context-  
119 specific PS genes, but it is not necessarily the case that genes with a PS phenotype *in vitro* act  
120 as TSG *in vivo*; PS genes are at best putative TSG in the absence of confirmatory data from  
121 tumor profiling.

122

123 Though detection of known PS genes is possible using existing informatics pipelines, several  
124 factors complicate a robust detection of these genes. There is no accepted threshold for any  
125 algorithm we considered to detect PS genes, since all were optimized to classify essential  
126 genes. A related second issue is that cell line screens show a wide range of variance in LFC  
127 distributions, making robust outlier detection challenging (**Supplementary Figure 1e**). Third, the  
128 signatures are strongly background-dependent, as demonstrated by *PTEN* and *TP53*. Finally,  
129 there is no consistent expectation for whether or how many putative tumor suppressor genes  
130 are present in a given cell line.

131

132 To address this gap, we developed a method to detect proliferation suppressor genes based on  
133 the normalized mean LFC of gRNA targeting a gene. To generate a null distribution, we label-  
134 shuffled guide-level LFC values for each screen, calculated gene-level mean fold change, and  
135 repeated this shuffling 1,000 times (**Figure 1d**). We used the mean and standard deviation of  
136 this randomized distribution of gene-level mean fold changes to calculate a Z-score for raw  
137 gene-level mean fold change for each cell line. This approach normalizes variance  
138 (**Supplementary Figure 1e-f**) across LFC distributions in different cell lines.

139

140 To evaluate the effectiveness of this shuffled Z-score approach, we used COSMIC<sup>41,42</sup> tumor  
141 suppressor genes as a positive reference set, and we combined COSMIC-defined oncogenes  
142 (removing dual-annotated tumor suppressors) with our previously-specified set of nonessential  
143 genes as a negative reference set<sup>8,43</sup>. Since there is no consistent expectation for the presence  
144 of PS genes across cell lines, we analyzed each of the 563 cell lines from the Avana 2019q2  
145 data release independently<sup>10,44,45</sup>, calculating gene-level scores on each cell line individually and  
146 then combining all scores into a master list of 563 x 17k = 9.8 million gene-cell line observations

147 **(Supplementary Table 1)**. Moreover, since there is also no expectation that all COSMIC TSG  
148 would be detected cumulatively across all cell lines, and similarly no expectation that any subset  
149 of known TSG would be detected in all cell lines, we judged that traditional recall metrics (e.g.  
150 percentage of the reference set recovered) were inappropriate. We therefore defined recall as  
151 the total number of TSG-cell line observations. Using this evaluation scheme, the shuffled Z-  
152 score approach outperforms comparable methods by a substantial margin, identifying more than  
153 500 PS-cell line instances at a 10% false discovery rate (FDR) (**Figure 1e**). This is roughly 50%  
154 more than the closest alternatives, JACKS<sup>46</sup> and a nonparametric rank-based approach.  
155 BAGEL<sup>47,48</sup>, a supervised classifier of essential genes, performed worst at detecting PS genes,  
156 and the raw mean LFC approach also fared poorly, highlighting the need for variance  
157 normalization across experiments. We applied this 10% FDR threshold for all subsequent  
158 analyses.

159  
160 Common tumor suppressor genes PTEN and TP53 were observed in ~15% of cell lines (**Figure**  
161 **1f**), with other well-known tumor suppressor genes appearing less frequently. Among 288  
162 COSMIC TSGs for which we have fitness profiles (representing 1.65% of all 17k genes), we find  
163 that 58 (20.1%) of these genes occur as proliferation suppressors at least once  
164 (**Supplementary Table 2**), and make up 16.6% of total proliferation suppressor calls  
165 (**Supplementary Figure 2a-b**), a 10-fold enrichment. All of the known TSG hits come from just  
166 249 of the 563 cell lines (49.7%) in which proliferation suppressor hit calls were identified  
167 (**Figure 1g**), yet we did not observe a bias toward particular tissues: in every lineage, most cell  
168 lines carried at least one PS gene (**Supplementary Figure 1g**).

169  
170 To further validate our approach, we compared the set of TSGs in our PS hits to other molecular  
171 profiling data. When identified as a proliferation suppressor, 63% of the 58 TSGs demonstrate  
172 higher mRNA expression relative to backgrounds where the same TSG is not a proliferation  
173 suppressor (**Supplementary Figure 2c** and **Supplementary Table 2**). Similarly, 84.5% of the  
174 58 TSGs, when identified as a proliferation suppressor, demonstrate lower rates of nonsilent  
175 mutations compared to backgrounds where the TSG is not a hit (**Supplementary Figure 2d** &  
176 **Supplementary Table 2**). Together, these observations confirm the reliability of our method to  
177 detect genes whose knockout results in faster cell proliferation, and that, analogous to essential  
178 genes, these genes must be expressed and must not harbor a loss-of-function mutation in order  
179 to elicit this phenotype.

180

181 We attempted to corroborate our findings using a second CRISPR dataset of 342 cell line  
182 screens from Behan *et al.*<sup>13</sup>, including >150 screens in the same cell lines as in the Avana data.  
183 However, these screens were conducted over a shorter timeframe than the Avana screens (14  
184 vs. 21 days), giving less time for both positive and negative selection signals to appear. The  
185 fitness enhancement introduced by PS gene knockout, relatively weak compared to severe  
186 defects from essential gene knockout, often precludes detection in a shorter experiment. In the  
187 example F5 cell line (**Figure 1a**), a 2.5-fold change over a 21-day time course corresponds to a  
188 fitness increase of only ~12% for rapidly growing cells, or a doubling time decrease from 24 to  
189 21 hours. In a 14-day experiment, this increased proliferation rate would result in an observed  
190 log fold change of only ~1.7, within the expected noise from genes with no knockout phenotype  
191 (see Methods). As a result, when we compared cell lines screened by both groups, the Avana  
192 data yielded many more TSG hits (**Supplementary Figure 3a**). While most of these do not  
193 meet our threshold for PS genes in the Sanger data, hits at our 10% FDR threshold across all  
194 Avana screens are strongly biased toward positive Z-scores in the Sanger screens  
195 (**Supplementary Figure 3b**), consistent with a weaker signal of positive selection as a result of  
196 the shorter assays rather than a lack of robustness in the screens<sup>49</sup>.

197

### 198 ***Discovering Pathways Modulating Cell Growth With A Proliferation Suppressor Co-*** 199 ***Occurrence Network***

200

201 Although known TSG act as PS genes in only a subset of cell lines, we observed patterns of co-  
202 occurrence among functionally related genes. *PTEN* co-occurs with mTOR regulators *NF2*<sup>50</sup> ( $P$   
203  $< 2 \times 10^{-6}$ , Fisher's exact test) and the *TSC1/TSC2* complex ( $P$ -values both  $< 2 \times 10^{-13}$ )<sup>51</sup>, as well  
204 as Programmed Cell Death 10 (*PDCD10*)<sup>52</sup>, a proposed tumor suppressor<sup>8,53</sup> (**Figure 2a**). The  
205 p53 regulatory cluster (*TP53*, *CDKN1A*, *CHECK2*, *TP53BP1*) also exhibited a strong co-  
206 occurrence pattern that was independent of the mTOR regulatory cluster (**Figure 2a**). mTOR<sup>54</sup>  
207 and cell cycle checkpoint genes<sup>55,56</sup> have been heavily linked to cancer development, given their  
208 roles in controlling cell growth and proliferation, and thus have been the focus of studies  
209 characterizing patient genomic profiles to identify common pathway alterations<sup>57,58</sup>.

210

211 The modularity of mTOR regulators and TP53 regulators demonstrates pathway-level  
212 proliferation suppressor activity. This reflects the concept of genes with correlated fitness  
213 profiles indicating the genes operate in the same biochemical pathway or biological  
214 process<sup>19,21,59,60</sup>. However, the sparseness of PS genes, coupled with their smaller effect sizes,



215 renders correlation networks relatively poor at identifying modules of genes with proliferation  
216 suppressor activity. In order to identify such modules, we developed a PS network based on  
217 statistical overrepresentation of co-occurring PS genes (**Figure 2b**); see Methods for details.  
218 This approach yields a network of 103 genes containing 157 edges in disconnected clusters;  
219 only 9 clusters have 3 or more genes (**Figure 2c** and **Supplementary Figure 4c**). Of these 157  
220 edges, 31 (20.1%, empirical  $P < 10^{-4}$ ) are present in the HumanNet<sup>61</sup> functional interaction  
221 network (**Supplementary Figure 4a-b**), indicating high functional coherence between  
222 connected genes. The network recovers the PTEN and TP53 modules as well as the Hippo  
223 pathway, the aryl hydrocarbon receptor complex (AHR/ARNT), the mTOR-repressing GATOR1  
224 complex, the STAGA chromatin remodeling complex, TYK2-STAT signaling, and the gamma-  
225 secretase complex (**Figure 2c**), all of which have been associated with tumor suppressor  
226 activity. The functional coherence and biological relevance of the PS co-occurrence network  
227 further validates the approach taken, and establishes this dataset as a resource for exploring  
228 putative tumor suppressor activity in cell lines and tumors.

229

### 230 ***Variation in Fatty Acid Metabolism in AML Cells***

231

232 In addition to the known tumor suppressors, we observed a large module containing elements of  
233 several fatty acid (FA) and lipid biosynthesis pathways (**Figure 2c**). Interestingly, while there  
234 does not appear to be a strong tissue specificity signature for most clusters (**Figure 2c**), the  
235 fatty acid metabolism cluster shows a strong enrichment for AML cell lines ( $P = 1.1 \times 10^{-5}$ ). AML,  
236 like most cancers, typically relies on increased glucose consumption for energy and diversion of  
237 glycolytic intermediates for the generation of biomass required for cell proliferation. Membrane  
238 biomass is generated by phospholipid biosynthesis that uses fatty acids as building blocks, with  
239 FA pools replenished by some combination of triglyceride catabolism, transporter-mediated  
240 uptake, and *de novo* synthesis via the *ACLY/ACACA/FASN* palmitate production pathway using  
241 citrate precursor diverted from the TCA cycle. Indeed the role of lipid metabolism in AML  
242 progression is indicated by changes in serum lipid content<sup>62</sup> in particular for long-chain  
243 saturated fatty acids that are the terminal product of the FAS pipeline. Inhibition of FA synthesis  
244 is therefore an appealing chemotherapeutic intervention<sup>63,64</sup> and FASN inhibitors are currently  
245 undergoing clinical trials for treatment of solid tumors and metabolic diseases<sup>40</sup>. The  
246 observation that knocking out FAS pathway genes results in *faster* proliferation in some AML  
247 cells, and their signature as putative tumor suppressor genes, is therefore very unexpected, and  
248 in our view warrants further study.



249

250 To learn whether additional elements of lipid metabolism were associated with the FAS cluster,  
251 we examined the differential correlation of shuffled Z-scores in AML cells. We and others have  
252 shown that genes with correlated gene knockout fitness profiles in CRISPR screens are likely to  
253 be involved in the same biological pathway or process (“co-functional”)<sup>18–21</sup>, analogous to  
254 correlated genetic interaction profiles in yeast<sup>25,27,65</sup>. Strikingly, all gene pairs within the fully  
255 connected clique in the FAS cluster (containing genes *FASN*, *ACACA*, *GPAT4*, *CHP1*, and *GPI*,  
256 **Figure 2c**) had a median Pearson correlation coefficient (PCC) of 0.90 in the 15 AML cell lines  
257 (range 0.87-0.97, **Figure 3a**, red), compared to median correlation of 0.18 in the remaining 548  
258 cell lines (range -0.04-0.58, with the highest correlation between *FASN* and *ACACA*, adjacent  
259 enzymes in the linear palmitate synthesis pathway; **Figure 3a**, gray). These high differential  
260 Pearson correlation coefficients (dPCC) suggest that variation in lipid metabolism is pronounced  
261 in AML cells<sup>66</sup>.

262

263 We sought to explore whether this difference in correlation identified other genes that might give  
264 insight into metabolic rewiring in AML. Calculating a global difference between PCC of all gene  
265 pairs in AML and in the remaining >500 cell lines yielded many gene pairs whose dPCC  
266 appeared indistinguishable from random sampling (**Supplementary Figure 5a-b**). To filter  
267 these, we calculated empirical P-values for each gene pair. We randomly selected 15 cell lines  
268 from the pool of all screens, calculated PCC for all gene pairs in the selected and remaining  
269 lines, and calculated dPCC from these PCC values (**Figure 3b**). We repeated this process  
270 1,000 times to generate an empirically-derived null distribution of dPCC values for each gene  
271 pair, against which a P-value could be computed (**Figure 3c-d**).

272

273 Expanding the set to a filtered list of genes whose correlation with a gene in the FAS clique  
274 showed significant change in AML cells ( $P < 0.001$ ; see Methods) yielded a total of 61 genes,  
275 including the 5 genes in the clique (**Figure 3e**) and the remaining genes in the co-occurrence  
276 network cluster (*LSS*, *ERO1A*, *SLC2A1*, *PGP*) plus Holocarboxylase Synthetase (*HLCS*), which  
277 biotinylates and activates acetyl-CoA-carboxylase, the protein product of *ACACA*. Interestingly,  
278 about a third of the genes showed significantly increased anticorrelation with the FAS cluster,  
279 indicating genes preferentially essential where the FAS genes act as proliferation suppressors  
280 (**Figure 3e**). These genes include fatty acid desaturase (*SCD*), which operates directly  
281 downstream from *FASN* to generate monounsaturated fatty acid species, and Sterol Regulatory  
282 Element Binding Transcription Factor 1 (*SREBF1*), the master regulatory factor for lipid

283 homeostasis in cells. Other lipid pathways are also represented, including  
284 plasmalogen desaturase (*TMEM189*), critical for plasmalogen synthesis<sup>67</sup>, and  
285 ceramide synthase 2 (*CERS2*), involved in *de novo* ceramide biosynthesis<sup>68</sup>, an important  
286 precursor for sphingomyelin in cell membranes.

287  
288 Clustering the AML cell lines according to these high dPCC genes reveals two distinct subsets  
289 of cells. The FAS cluster and its correlates show strong proliferation suppressor phenotype in  
290 four cell lines, NB4, MV411, MOLM13, and THP1. The remaining eleven AML cell lines show  
291 negligible to weakly essential phenotypes when these genes are knocked out. The  
292 anticorrelated genes, including *SCD* and *SREBF1*, show heightened essentiality in these same  
293 cell lines. Together these observed shifts in gene knockout fitness indicates that this subset of  
294 AML cells has a specific metabolic rewiring. Because these cells share a genetic signature  
295 among fatty acid synthesis pathway genes that is consistent with tumor suppressors, we call  
296 these cell lines Fatty Acid Synthesis/Tumor Suppressor (FASTS) cells (**Figure 3e**).

### 297 298 ***Cas12a-mediated Genetic Interaction Screens Confirm Rewired Lipid Metabolism***

299  
300 We sought to confirm whether gene knockout confers improved cell fitness, and to gather some  
301 insight into why some AML cells show the FASTS phenotype and others do not. We designed a  
302 CRISPR screen that measures the genetic interactions between eight selected “query genes”  
303 and ~100 other genes (“array genes”). The query genes include *FASN* and *ACACA*, from the  
304 cluster of proliferation-suppressor genes, as well as lipid homeostasis transcription factor  
305 *SREBF1*, anticorrelated with the FAS cluster in the differential network analysis, and  
306 uncharacterized gene *c12orf49*, previously implicated in lipid metabolism by coessentiality<sup>21</sup> and  
307 a recent genetic interaction study<sup>60</sup>. Additional query genes include control tumor suppressor  
308 genes *TP53* and *PTEN* and control context-dependent essential genes *GPX4* and *PSTK*  
309 (**Figure 4a**). The array genes include two to three genes each from several metabolic pathways,  
310 including various branches of lipid biosynthesis, glycolysis and glutaminolysis, oxphos,  
311 peroxisomal and mitochondrial fatty acid oxidation. We include the query genes in the array  
312 gene set (**Figure 4a**) to test for screen artifacts and further add control essential and  
313 nonessential genes to measure overall screen efficacy (**Supplementary Table 3-4**).

314  
315 We used the enCas12a CRISPR endonuclease system to carry out multiplex gene knockouts<sup>35</sup>.  
316 We used a dual-guide enCas12a design, as described in DeWeirdt *et al.*<sup>34</sup>, that allows for

317 construction of specific guide pairs through pooled oligonucleotide synthesis (**Figure 4b**). The  
318 library robustly measures single knockout fitness by pairing three Cas12a crRNA per target  
319 gene each with five crRNA targeting nonessential genes<sup>8,43</sup> (n=15 constructs for single knockout  
320 fitness), and efficiently assays double knockout fitness by measuring all guides targeting query-  
321 array gene pairs (n=9) (**Figure 4c & Supplementary Table 4**). Using this efficient design and  
322 the endogenous multiplexing capability of enCas12a, we were able to synthesize a library  
323 targeting 800 gene pairs with a single 12k oligonucleotide array.

324  
325 We screened one AML cell line from the FASTS subset, MOLM13, and a second one with no  
326 FAS phenotype, NOMO1, collecting samples at 14 and 21 days after transduction with a five-  
327 day puromycin selection (**Supplementary Table 5-6**). Importantly, by comparing the mean log  
328 fold change of query gene knockouts in the “A” position vs. the same genes in the “B” position of  
329 the dual knockout vector, we find no positional bias in the multiplex knockout constructs (**Figure**  
330 **4d**), consistent with our previous findings<sup>23,34</sup>. Single knockout fitness measurements effectively  
331 segregated known essential genes from nonessentials, confirming the efficacy of the primary  
332 screens (**Supplementary Figure 6**). Context-dependent fitness profiles are consistent with the  
333 cell genotypes, with *PTEN* and *TSC1* showing positive selection in *PTEN*<sup>wt</sup> NOMO1 cells and  
334 *TP53* being a strong PS gene in *P53*<sup>wt</sup> MOLM13 cells. Strikingly, *CHP1* and *GPAT4* are the next  
335 two top hits in MOLM13, confirming their proliferation suppressor phenotype (**Figure 4e**), while  
336 neither shows a phenotype in NOMO1. Together these observations validate the enCas12a-  
337 mediated multiplex perturbation platform, confirm the ability of CRISPR knockout screens to  
338 detect proliferation suppressors, and corroborate the background-specific fitness enhancing  
339 effects of genes from the FAS cluster.

340  
341 To measure genetic interactions, we fit a linear regression for each guide between the  
342 combination LFCs and the single guide LFCs, Z-scoring the residuals from this line, and  
343 combining across all guides targeting the same gene pair (**Supplementary Figure 6 &**  
344 **Supplementary Table 6**). Here, positive genetic interaction Z-scores reflect greater fitness than  
345 expected and negative Z-scores represent lower than expected based on the single gene  
346 knockouts independently, similar to the methodology applied in a recent survey of genetic  
347 interactions in cancer cells using multiplex CRISPR perturbation<sup>33</sup> (see Methods). Gene self-  
348 interactions (when the same gene is in the A and B position, **Figure 4d**) should therefore be  
349 negative for proliferation suppressors and positive for essentials (**Figure 4f-g, Supplementary**  
350 **Figure 6**). Overall, genetic interaction Z-scores in the two cell lines showed moderate

351 correlation (**Figure 4g**) and previously reported synthetic interactions between *C12orf49* and  
352 low-density lipoprotein receptor *LDLR*<sup>17</sup> and between *SREBF1* and its paralog *SREBF2*<sup>17</sup> are  
353 identified in both cell lines (**Supplementary Figure 6f-g**).

354

355 In contrast with the interactions found in both cell lines, background-specific genetic interactions  
356 reflect the genotypic and phenotypic differences between the cells. The negative interaction  
357 between tumor suppressor *PTEN* and mTOR repressor *TSC1* in *PTEN*<sup>wt</sup> NOMO1 cells is  
358 consistent with their epistatic roles in the mTOR regulatory pathway. Both genes show positive  
359 knockout fitness in NOMO1 (**Figure 4e**) but their dual knockout does not provide an additive  
360 growth effect, resulting in a suppressor interaction with a negative Z-score (**Figure 4g-h**).  
361 Similarly, suppressor genetic interactions between *ACACA* and downstream proliferation  
362 suppressor genes *CHP1* and *GPAT4* are pronounced in MOLM13 cells, consistent with epistatic  
363 relationships in a linear biochemical pathway (**Figure 4h**). These interactions are not replicated  
364 with query gene *FASN*, but both *FASN* and *ACACA* show negative interactions with fatty acid  
365 transport gene *FABP5* and positive interactions with *SREBF1* and *SCD*, the primary desaturase  
366 of long-chain saturated fatty acids. All of these interactions are absent in NOMO1,  
367 demonstrating the rewiring of the lipid biosynthesis genetic interaction network between these  
368 two cell types (**Figure 4h**).

369

### 370 ***FASTS Signature Predicts Sensitivity to Saturated Fatty Acids***

371

372 The significant differences in the single- and double-knockout fitness signatures between the  
373 two cell lines suggests a major rewiring of lipid metabolism in these cells. *CHP1* and *GPAT4* are  
374 reciprocal top correlates in the Avana coessentiality network ( $r=0.43$ ,  $P=2.5 \times 10^{-34}$ ), strongly  
375 predicting gene co-functionality<sup>21</sup>. Two recent studies characterized the role of lysophosphatidic  
376 acid acyltransferase *GPAT4* in adding saturated acyl moieties to glycerol 3-phosphate,  
377 generating lysophosphatidic acid (LPA) and phosphatidic acid (PA), the precursors for cellular  
378 phospholipids and triglycerides, and further discovered *CHP1* as a key regulatory factor for  
379 *GPAT4* activity<sup>69,70</sup>. Within hematological cancer cell lines, the coessentiality network is  
380 significantly restructured, with the *ACACA/FASN* module correlated with *SCD* in most  
381 backgrounds ( $r=0.33$ ) but strongly anticorrelated ( $r=-0.63$ ) in blood cancers (**Figure 3e**). The  
382 magnitude of this change in correlation is ranked #7 out of 164 million gene pairs, with the other  
383 six comprising interactions that are specific to other contexts -- e.g. *BRAF-SOX10* are  
384 anticorrelated in blood ( $r= -0.41$ ) but highly correlated ex-blood ( $r=0.59$ ) due to their co-

385 essentiality in *BRAF*<sup>V600E</sup> melanoma cells. In contrast, *ACACA* and *FASN* are weakly correlated  
386 with *CHP1* in most tissues but strongly correlated in AML, with underlying covariation largely  
387 driven by the PS phenotype in FASTS cells (**Figure 3e**). This pathway sign reversal is  
388 confirmed in the single knockout fitness observed in our screens: *SCD* is strongly essential in  
389 MOLM-13 but not in NOMO-1 (**Figure 4e**).

390  
391 Collectively these observations make a strong prediction about the metabolic processing of  
392 specific lipid species. Faster proliferation upon knockout of genes related to saturated fatty acid  
393 processing, coupled with increased dependency on fatty acid desaturase (**Figure 5a**), suggests  
394 that these cells are at or near their carrying capacity for saturated fatty acids. To test this  
395 prediction, we exposed three FASTS cell lines and four other AML cell lines to various species  
396 of saturated and unsaturated fatty acids. FASTS cells showed significantly increased apoptosis  
397 in the presence of 200  $\mu$ m palmitate (**Figure 5b-c**) while no other species of saturated or  
398 unsaturated fatty acid showed similar differential sensitivity. In addition, analysis of metabolic  
399 profiles of cells in the Cancer Cell Line Encyclopedia<sup>71,72</sup> showed that saturated acyl chains are  
400 markedly overrepresented in triacylglycerol (TAG) in FASTS cells (**Figure 5d**), in contrast with  
401 other lipid species measured (**Supplementary Figure 7**). Palmitate-induced lipotoxicity has  
402 been studied in many contexts – and importantly, the role of *GPAT4* and *CHP1* in mediating  
403 lipotoxicity was well described recently<sup>69,70</sup> – but, to our knowledge, this is the first instance of a  
404 genetic signature that predicts liposensitivity.

405

#### 406 ***Clinical Relevance of FASTS Subtype***

407

408 To explore whether the FASTS phenotype has clinical relevance, we compared our results with  
409 patient survival information from public databases. Using genetic characterization data from  
410 CCLE<sup>71</sup>, we did not find any lesion which segregated FASTS cells from other CD33+ AML cells  
411 (**Figure 6a**), so no mutation is nominated to drive a FASTS phenotype *in vivo*. Instead, we  
412 explored whether variation in gene expression was associated with patient outcomes. We  
413 included genes in the core FASTS module as well as genes with strong genetic interactions with  
414 *ACACA/FASN* in our screen (**Figure 6a**). To select an appropriate cohort for genomic analysis,  
415 we first considered patient age. Although AML is present across every decade of life, patients  
416 from whom FASTS cell lines were derived are all under 30 years of age (sources of other AML  
417 cells ranged from 7 to 68 years; **Figure 6b**). With this in mind, we explored data from the  
418 TARGET-AML<sup>73</sup> project, which focuses on childhood cancers (**Figure 6c**). Using TARGET

419 data, we calculated hazard ratios using univariate Cox proportional-hazards modeling with  
420 continuous mRNA expression values for our genes of interest as independent variables. We  
421 observed that both *CHP1* and *GPAT4* show significant, negative hazard ratios (HR), consistent  
422 with a tumor suppressor signature (**Figure 6d**), and that no other gene from our set shows a  
423 negative HR. Indeed, tumors in the top quartile of gene expression showed significantly  
424 improved survival for both *CHP1* (P-value 0.007, **Figure 6e**) and *GPAT4* (P-value 0.035, **Figure**  
425 **6f**). These findings are not replicated for *CHP1* and *GPAT4* in the TCGA<sup>74</sup> or OHSU<sup>75</sup> tumor  
426 genomics data sets, suggesting the FASTS phenotype might be restricted to juvenile leukemias.

427

## 428 **Discussion**

429

430 CRISPR screens have had a profound impact on cancer functional genomics. While research  
431 has been mainly focused on essential gene phenotypes, there is still much clinically relevant  
432 biology that can be uncovered by examining other phenotypes from a genetic screen. We  
433 establish a methodology that can identify the proliferation suppressor phenotype from whole-  
434 genome CRISPR knockout genetic screens. This represents, to our knowledge, the first  
435 systematic study of this phenotype in the ~1,000 published screens<sup>7,10,11,13,44</sup>.

436

437 The activity of PS genes is inherently context-dependent, rendering global classification difficult.  
438 As with context-dependent essential genes, the strongest signal is attained when comparing  
439 knockout phenotype with underlying mutation state. For example, wildtype and mutant alleles of  
440 classic tumor suppressor examples *TP53* and *PTEN* are present in large numbers of cell lines,  
441 enabling relatively easy discrimination of PS behavior in wildtype backgrounds, but most  
442 mutations are much more rare, reducing statistical power. Our model-based approach enables  
443 the discovery of PS phenotype as an outlier from null-phenotype knockouts. Using this  
444 approach, we recover COSMIC-annotated TSGs exhibiting the PS phenotype when wildtype  
445 alleles are expressed at nominal levels.

446

447 Co-occurrence of proliferation suppressors follows the principles of modular biology, with genes  
448 in the same pathway acting as proliferation suppressors in the same cell lines. We observe  
449 background-specific putative tumor suppressor activity for the PTEN pathway, P53 regulation,  
450 mTOR signaling, chromatin remodeling, and others. The co-occurrence network also reveals a  
451 novel module associated with glycerolipid biosynthesis, which exhibits the PS phenotype in a  
452 subset of AML cells. Analysis of the rewiring of the lipid metabolism coessentiality network in



453 AML cells corroborated this discovery, and led us to define the Fatty Acid Synthesis/Tumor  
454 Suppressor (FASTS) phenotype in four AML cell lines. A survey of genetic interactions, using  
455 the enCas12a multiplex knockout platform, showed major network rewiring between FASTS and  
456 other AML cells, and revealed strong genetic interactions in FASTS cells with *GPAT4*, a key  
457 enzyme in the processing of saturated fatty acids, and its regulator *CHP1*. Collectively these  
458 observations suggest that FASTS cells are near some critical threshold for saturated fatty acid  
459 carrying capacity, which we validated biochemically by treatment with fatty acids and  
460 bioinformatically by comparison with CCLE metabolomic profiling.

461  
462 Confirming the clinical relevance of an *in vitro* phenotype can be difficult. No obvious mutation  
463 segregates FASTS cells from other AML cells, and with only four cell lines showing the FASTS  
464 phenotype, we lack the statistical power to discover associations in an unbiased way. However,  
465 by narrowing our search to strong hits from the differential network analyses, we found a  
466 significant survival advantage in a roughly age-matched cohort for *GPAT4* and *CHP1*  
467 overexpression. This finding is consistent with a wholly novel tumor suppressor signature for our  
468 PS gene module.

469  
470 The combination of genetic, biochemical, and clinical support for the discovery of a novel tumor  
471 suppressor module has several implications. First, it provides a clinical signature that warrants  
472 further research as a prognostic marker as well as a potential therapeutic target -- and a high-  
473 risk group for fatty acid synthesis inhibitors. Second, it demonstrates the power of differential  
474 network analysis, and in particular differential genetic interaction networks, to dissect the  
475 rewiring of molecular pathways from modular phenotypes. And finally, it suggests that there still  
476 may be much to learn from data-driven analyses of large-scale screen data, beyond the low-  
477 hanging fruit of lesion/vulnerability associations.

478  
479  
480



481 **Acknowledgments**

482

483 WFL, MMc, MMo, and TH were supported by NIGMS grant R35GM130119. MC is supported by  
484 a Kopchick fellowship and Pauline Altman-Goldstein Foundation Discovery Fellowship. EK is  
485 supported by a grant from the Prostate Cancer Foundation. MD is supported by a Schissler  
486 Foundation fellowship. TH is a CPRIT Scholar in Cancer Research (RR160032). WFL is  
487 supported by the American Legion Auxiliary Fellowship in Cancer Research. This work was  
488 supported by the Andrew Sabin Family Foundation Fellowship. Flow cytometry was performed  
489 at MDACC's Advanced Cytometry & Sorting Facility supported by the NCI Cancer Center  
490 Support Grant P30CA16672.

491

492 **Author Contributions**

493

494 WFL performed all PS discovery analysis. MF, AG, AS performed genetic interaction screens  
495 and PD, MC performed bioinformatic analysis. WFL, MC, EK, and MD performed all other  
496 bioinformatic analysis. MMo and MMc performed lipid profiling experiments. JGD and TH  
497 supervised the research. WFL and TH drafted the manuscript and all authors edited it.

498

499 **Competing Interests**

500

501 TH is a consultant for Repare Therapeutics. JGD consults for Agios, Maze Therapeutics,  
502 Microsoft Research, and Pfizer; JGD consults for and has equity in Tango Therapeutics. WFL is  
503 a consultant for BioAge Labs.

504

505

506 **References**

507

- 508 1. Jinek, M. *et al.* A Programmable Dual-RNA–Guided DNA Endonuclease in Adaptive  
509 Bacterial Immunity. *Science* **337**, 816–821 (2012).
- 510 2. Mali, P. *et al.* RNA-Guided Human Genome Engineering via Cas9. *Science* **339**, 823–826  
511 (2013).
- 512 3. Mali, P., Esvelt, K. M. & Church, G. M. Cas9 as a versatile tool for engineering biology. *Nat.*  
513 *Methods* **10**, 957–963 (2013).
- 514 4. Cong, L. *et al.* Multiplex genome engineering using CRISPR/Cas systems. *Science* **339**,  
515 819–823 (2013).
- 516 5. Shalem, O., Sanjana, N. E. & Zhang, F. High-throughput functional genomics using  
517 CRISPR-Cas9. *Nat. Rev. Genet.* **16**, 299–311 (2015).
- 518 6. Wang, T., Wei, J. J., Sabatini, D. M. & Lander, E. S. Genetic screens in human cells using  
519 the CRISPR-Cas9 system. *Science* **343**, 80–84 (2014).
- 520 7. Wang, T. *et al.* Identification and characterization of essential genes in the human genome.  
521 *Science* **350**, 1096–1101 (2015).
- 522 8. Hart, T. *et al.* High-Resolution CRISPR Screens Reveal Fitness Genes and Genotype-  
523 Specific Cancer Liabilities. *Cell* **163**, 1515–1526 (2015).
- 524 9. Aguirre, A. J. *et al.* Genomic Copy Number Dictates a Gene-Independent Cell Response to  
525 CRISPR/Cas9 Targeting. *Cancer Discov.* **6**, 914–929 (2016).
- 526 10. Meyers, R. M. *et al.* Computational correction of copy number effect improves specificity of  
527 CRISPR-Cas9 essentiality screens in cancer cells. *Nat. Genet.* **49**, 1779–1784 (2017).
- 528 11. Tsherniak, A. *et al.* Defining a Cancer Dependency Map. *Cell* **170**, 564-576.e16 (2017).
- 529 12. Tzelepis, K. *et al.* A CRISPR Dropout Screen Identifies Genetic Vulnerabilities and  
530 Therapeutic Targets in Acute Myeloid Leukemia. *Cell Rep.* **17**, 1193–1205 (2016).
- 531 13. Behan, F. M. *et al.* Prioritization of cancer therapeutic targets using CRISPR-Cas9 screens.

- 532 *Nature* **568**, 511–516 (2019).
- 533 14. Lagziel, S., Lee, W. D. & Shlomi, T. Inferring cancer dependencies on metabolic genes from  
534 large-scale genetic screens. *BMC Biol.* **17**, 37 (2019).
- 535 15. Rossiter, N. J. *et al.* CRISPR screens in physiologic medium reveal conditionally essential  
536 genes in human cells. *bioRxiv* 2020.08.31.275107 (2020) doi:10.1101/2020.08.31.275107.
- 537 16. Zhao, D. *et al.* Combinatorial CRISPR-Cas9 Metabolic Screens Reveal Critical Redox  
538 Control Points Dependent on the KEAP1-NRF2 Regulatory Axis. *Mol. Cell* **69**, 699-708.e7  
539 (2018).
- 540 17. Aregger, M. *et al.* Systematic mapping of genetic interactions for de novo fatty acid  
541 synthesis identifies C12orf49 as a regulator of lipid metabolism. *Nat. Metab.* **2**, 499–513  
542 (2020).
- 543 18. Wang, T. *et al.* Gene Essentiality Profiling Reveals Gene Networks and Synthetic Lethal  
544 Interactions with Oncogenic Ras. *Cell* **168**, 890-903.e15 (2017).
- 545 19. Boyle, E. A., Pritchard, J. K. & Greenleaf, W. J. High-resolution mapping of cancer cell  
546 networks using co-functional interactions. *Mol. Syst. Biol.* **14**, e8594 (2018).
- 547 20. Rauscher, B. *et al.* Toward an integrated map of genetic interactions in cancer cells. *Mol.*  
548 *Syst. Biol.* **14**, e7656 (2018).
- 549 21. Kim, E. *et al.* A network of human functional gene interactions from knockout fitness screens  
550 in cancer cells. *Life Sci. Alliance* **2**, (2019).
- 551 22. Kegel, B. D. & Ryan, C. J. Paralog buffering contributes to the variable essentiality of genes  
552 in cancer cell lines. *PLOS Genet.* **15**, e1008466 (2019).
- 553 23. Dede, M., McLaughlin, M., Kim, E. & Hart, T. Multiplex enCas12a screens show functional  
554 buffering by paralogs is systematically absent from genome-wide CRISPR/Cas9 knockout  
555 screens. *bioRxiv* 2020.05.18.102764 (2020) doi:10.1101/2020.05.18.102764.
- 556 24. Beltrao, P., Cagney, G. & Krogan, N. J. Quantitative genetic interactions reveal biological  
557 modularity. *Cell* **141**, 739–745 (2010).

- 558 25. Costanzo, M. *et al.* The genetic landscape of a cell. *Science* **327**, 425–431 (2010).
- 559 26. Martin, H. *et al.* Differential genetic interactions of yeast stress response MAPK pathways.  
560 *Mol. Syst. Biol.* **11**, 800 (2015).
- 561 27. Costanzo, M. *et al.* A global genetic interaction network maps a wiring diagram of cellular  
562 function. *Science* **353**, (2016).
- 563 28. Wong, A. S. L. *et al.* Multiplexed barcoded CRISPR-Cas9 screening enabled by  
564 CombiGEM. *Proc. Natl. Acad. Sci.* **113**, 2544–2549 (2016).
- 565 29. Shen, J. P. *et al.* Combinatorial CRISPR–Cas9 screens for de novo mapping of genetic  
566 interactions. *Nat. Methods* **14**, 573–576 (2017).
- 567 30. Han, K. *et al.* Synergistic drug combinations for cancer identified in a CRISPR screen for  
568 pairwise genetic interactions. *Nat. Biotechnol.* **35**, 463–474 (2017).
- 569 31. Najm, F. J. *et al.* Orthologous CRISPR-Cas9 enzymes for combinatorial genetic screens.  
570 *Nat. Biotechnol.* **36**, 179–189 (2018).
- 571 32. Du, D. *et al.* Genetic interaction mapping in mammalian cells using CRISPR interference.  
572 *Nat. Methods* **14**, 577–580 (2017).
- 573 33. Horlbeck, M. A. *et al.* Mapping the Genetic Landscape of Human Cells. *Cell* **174**, 953-  
574 967.e22 (2018).
- 575 34. DeWeirdt, P. C. *et al.* Optimization of AsCas12a for combinatorial genetic screens in human  
576 cells. *Nat. Biotechnol.* 1–11 (2020) doi:10.1038/s41587-020-0600-6.
- 577 35. Kleinstiver, B. P. *et al.* Engineered CRISPR-Cas12a variants with increased activities and  
578 improved targeting ranges for gene, epigenetic and base editing. *Nat. Biotechnol.* **37**, 276–  
579 282 (2019).
- 580 36. Bandyopadhyay, S. *et al.* Rewiring of genetic networks in response to DNA damage.  
581 *Science* **330**, 1385–1389 (2010).
- 582 37. Ideker, T. & Krogan, N. J. Differential network biology. *Mol. Syst. Biol.* **8**, 565 (2012).
- 583 38. Colic, M. *et al.* Identifying chemogenetic interactions from CRISPR screens with drugZ.

- 584 *Genome Med.* **11**, 52 (2019).
- 585 39. Menendez, J. A. & Lupu, R. Fatty acid synthase (FASN) as a therapeutic target in breast  
586 cancer. *Expert Opin. Ther. Targets* **21**, 1001–1016 (2017).
- 587 40. Search of: FASN - List Results - ClinicalTrials.gov.  
588 <https://clinicaltrials.gov/search?cond=FASN>.
- 589 41. Sondka, Z. *et al.* The COSMIC Cancer Gene Census: describing genetic dysfunction across  
590 all human cancers. *Nat. Rev. Cancer* **18**, 696–705 (2018).
- 591 42. Bamford, S. *et al.* The COSMIC (Catalogue of Somatic Mutations in Cancer) database and  
592 website. *Br. J. Cancer* **91**, 355–358 (2004).
- 593 43. Hart, T., Brown, K. R., Sircoulomb, F., Rottapel, R. & Moffat, J. Measuring error rates in  
594 genomic perturbation screens: gold standards for human functional genomics. *Mol. Syst.*  
595 *Biol.* **10**, 733 (2014).
- 596 44. Dempster, J. M. *et al.* Extracting Biological Insights from the Project Achilles Genome-Scale  
597 CRISPR Screens in Cancer Cell Lines. *bioRxiv* 720243 (2019) doi:10.1101/720243.
- 598 45. DepMap, B. DepMap 19Q2 Public. (2019) doi:10.6084/m9.figshare.8061398.v1.
- 599 46. Allen, F. *et al.* JACKS: joint analysis of CRISPR/Cas9 knockout screens. *Genome Res.* **29**,  
600 464–471 (2019).
- 601 47. Hart, T. & Moffat, J. BAGEL: a computational framework for identifying essential genes from  
602 pooled library screens. *BMC Bioinformatics* **17**, 164 (2016).
- 603 48. Kim, E. & Hart, T. Improved analysis of CRISPR fitness screens and reduced off-target  
604 effects with the BAGEL2 gene essentiality classifier. *bioRxiv* 2020.05.30.125526 (2020)  
605 doi:10.1101/2020.05.30.125526.
- 606 49. Dempster, J. M. *et al.* Agreement between two large pan-cancer CRISPR-Cas9 gene  
607 dependency data sets. *Nat. Commun.* **10**, 5817 (2019).
- 608 50. James, M. F. *et al.* NF2/merlin is a novel negative regulator of mTOR complex 1, and  
609 activation of mTORC1 is associated with meningioma and schwannoma growth. *Mol. Cell.*

- 610 *Biol.* **29**, 4250–4261 (2009).
- 611 51. Huang, J., Dibble, C. C., Matsuzaki, M. & Manning, B. D. The TSC1-TSC2 complex is  
612 required for proper activation of mTOR complex 2. *Mol. Cell. Biol.* **28**, 4104–4115 (2008).
- 613 52. Marchi, S. *et al.* Defective autophagy is a key feature of cerebral cavernous malformations.  
614 *EMBO Mol. Med.* **7**, 1403–1417 (2015).
- 615 53. Zhu, Y. *et al.* Loss of endothelial programmed cell death 10 activates glioblastoma cells and  
616 promotes tumor growth. *Neuro-Oncol.* **18**, 538–548 (2016).
- 617 54. Pópulo, H., Lopes, J. M. & Soares, P. The mTOR signalling pathway in human cancer. *Int.*  
618 *J. Mol. Sci.* **13**, 1886–1918 (2012).
- 619 55. Massagué, J. G1 cell-cycle control and cancer. *Nature* **432**, 298–306 (2004).
- 620 56. Evan, G. I. & Vousden, K. H. Proliferation, cell cycle and apoptosis in cancer. *Nature* **411**,  
621 342–348 (2001).
- 622 57. Donehower, L. A. *et al.* Integrated Analysis of TP53 Gene and Pathway Alterations in The  
623 Cancer Genome Atlas. *Cell Rep.* **28**, 1370-1384.e5 (2019).
- 624 58. Zhang, Y. *et al.* A Pan-Cancer Proteogenomic Atlas of PI3K/AKT/mTOR Pathway  
625 Alterations. *Cancer Cell* **31**, 820-832.e3 (2017).
- 626 59. Pan, J. *et al.* Interrogation of Mammalian Protein Complex Structure, Function, and  
627 Membership Using Genome-Scale Fitness Screens. *Cell Syst.* **6**, 555-568.e7 (2018).
- 628 60. Bayraktar, E. C. *et al.* Metabolic coessentiality mapping identifies C12orf49 as a regulator of  
629 SREBP processing and cholesterol metabolism. *Nat. Metab.* **2**, 487–498 (2020).
- 630 61. Hwang, S. *et al.* HumanNet v2: human gene networks for disease research. *Nucleic Acids*  
631 *Res.* **47**, D573–D580 (2019).
- 632 62. Khalid, A., Siddiqui, A. J., Huang, J.-H., Shamsi, T. & Musharraf, S. G. Alteration of Serum  
633 Free Fatty Acids are Indicators for Progression of Pre-leukaemia Diseases to Leukaemia.  
634 *Sci. Rep.* **8**, 14883 (2018).
- 635 63. Flavin, R., Peluso, S., Nguyen, P. L. & Loda, M. Fatty acid synthase as a potential

- 636 therapeutic target in cancer. *Future Oncol.* **6**, 551–562 (2010).
- 637 64. Punekar, S. & Cho, D. C. Novel Therapeutics Affecting Metabolic Pathways. *Am. Soc. Clin.*  
638 *Oncol. Educ. Book* e79–e87 (2019) doi:10.1200/EDBK\_238499.
- 639 65. Roguev, A. *et al.* Conservation and rewiring of functional modules revealed by an epistasis  
640 map in fission yeast. *Science* **322**, 405–410 (2008).
- 641 66. Li, K.-C. Genome-wide coexpression dynamics: Theory and application. *Proc. Natl. Acad.*  
642 *Sci. U. S. A.* **99**, 16875–16880 (2002).
- 643 67. Gallego-García, A. *et al.* A bacterial light response reveals an orphan desaturase for human  
644 plasmalogen synthesis. *Science* **366**, 128–132 (2019).
- 645 68. Mullen, T. D., Hannun, Y. A. & Obeid, L. M. Ceramide synthases at the centre of  
646 sphingolipid metabolism and biology. *Biochem. J.* **441**, 789–802 (2012).
- 647 69. Piccolis, M. *et al.* Probing the Global Cellular Responses to Lipotoxicity Caused by  
648 Saturated Fatty Acids. *Mol. Cell* **74**, 32-44.e8 (2019).
- 649 70. Zhu, X. G. *et al.* CHP1 Regulates Compartmentalized Glycerolipid Synthesis by Activating  
650 GPAT4. *Mol. Cell* **74**, 45-58.e7 (2019).
- 651 71. Ghandi, M. *et al.* Next-generation characterization of the Cancer Cell Line Encyclopedia.  
652 *Nature* **569**, 503–508 (2019).
- 653 72. Li, H. *et al.* The landscape of cancer cell line metabolism. *Nat. Med.* **25**, 850–860 (2019).
- 654 73. Meshinchi, S. & Arceci, R. TARGET: Acute Myeloid Leukemia (AML), dbGaP Study  
655 Accession: phs000465.v19.p8. [https://www.ncbi.nlm.nih.gov/projects/gap/cgi-](https://www.ncbi.nlm.nih.gov/projects/gap/cgi-bin/study.cgi?study_id=phs000465.v19.p8)  
656 [bin/study.cgi?study\\_id=phs000465.v19.p8](https://www.ncbi.nlm.nih.gov/projects/gap/cgi-bin/study.cgi?study_id=phs000465.v19.p8).
- 657 74. Genomic and Epigenomic Landscapes of Adult De Novo Acute Myeloid Leukemia. *N. Engl.*  
658 *J. Med.* **368**, 2059–2074 (2013).
- 659 75. Tyner, J. W. *et al.* Functional genomic landscape of acute myeloid leukaemia. *Nature* **562**,  
660 526–531 (2018).
- 661



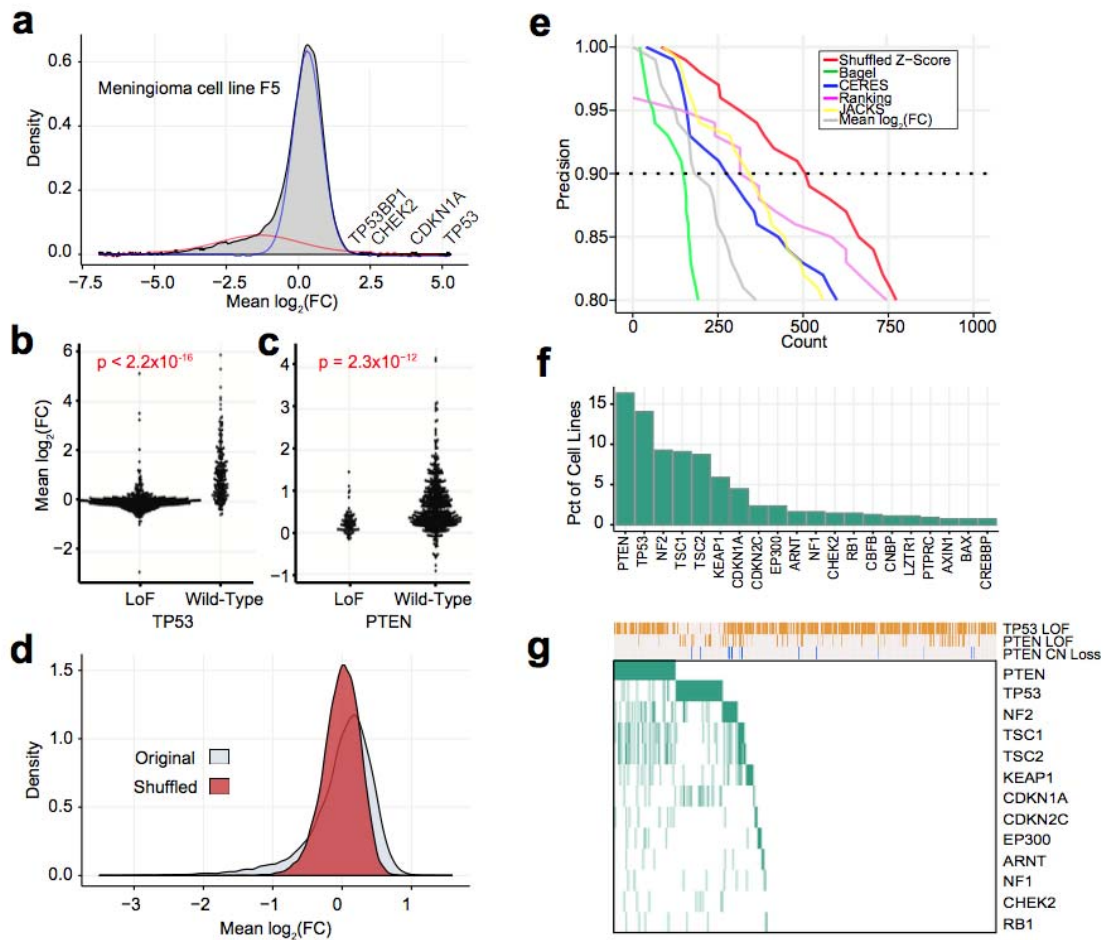

662  
663

664 **Figure 1. Discovery of Proliferation Suppressor genes.** (a) Fold-change distribution of a  
665 typical CRISPR knockout screen has a long left tail of essential genes, and a small number of  
666 genes whose knockout increases fitness (proliferation suppressors, “PS genes”). (b) and (c)  
667 Fold change of known tumor suppressors across 563 cell lines. Red, P-values are from  
668 corresponding Wilcoxon rank-sum tests. (d) Distribution of mean log fold change before and  
669 after label-shuffling. (e) Precision vs. recall of shuffled Z-score and other CRISPR analysis  
670 methods. Dashed line, 90% precision (10% FDR). (f) Fraction of cell lines in which known tumor  
671 suppressors are classified as PS genes at 10% FDR. (g) Presence of each known TSG across  
672 563 cell lines, vs. cell genetic background. Gold, mutation present; gray, absent. Green, gene is  
673 classified as a proliferation suppressor.

674  
675

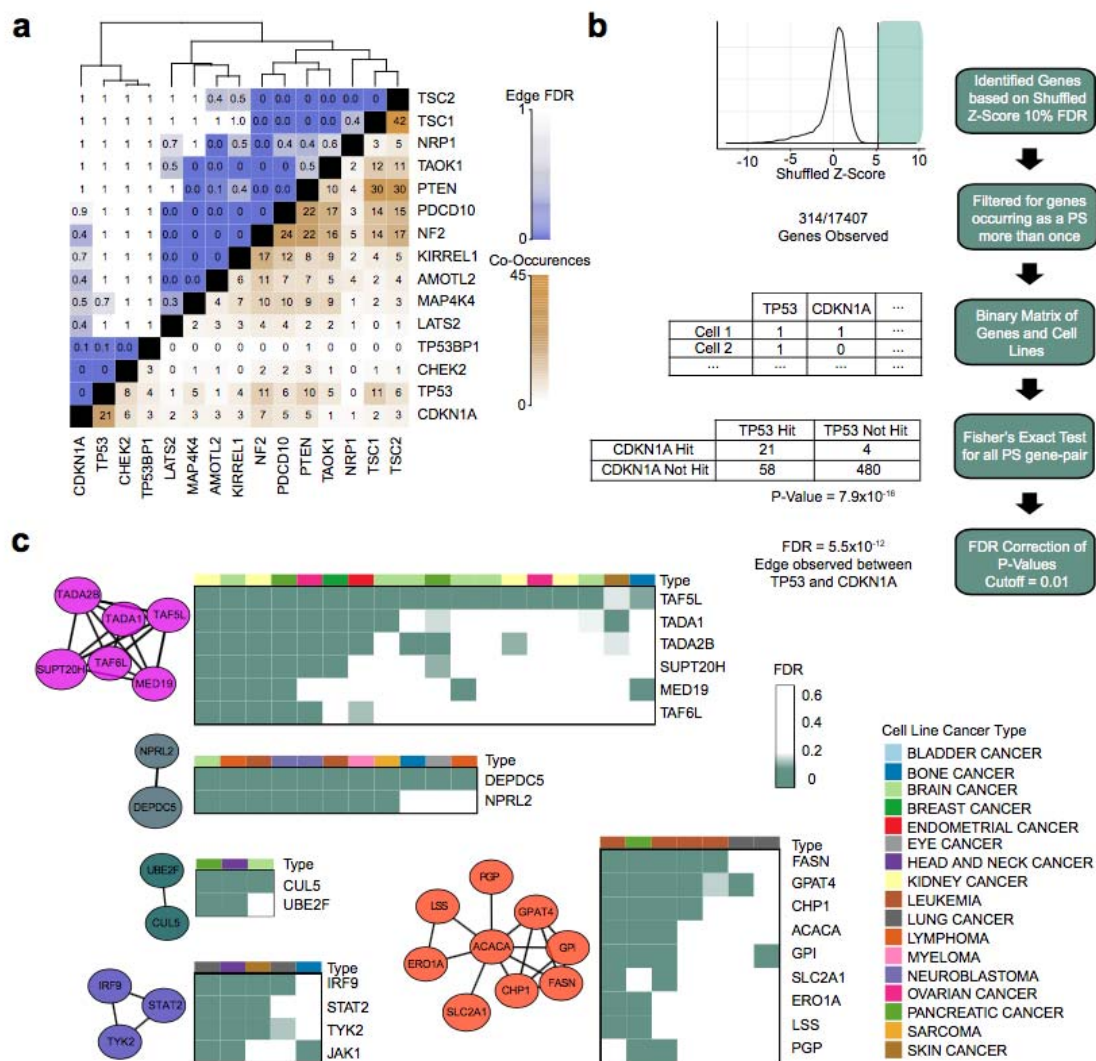

676  
677  
678

679 **Figure 2. Co-occurrence of PS genes.** (a) Co-occurrence/mutual exclusivity of common TSG  
680 as PS genes in CRISPR screens. Brown, number of cell lines in which two genes co-occur as  
681 PS genes at 10% FDR. Blue, FDR of co-occurrence. Hierarchical clustering indicates functional  
682 modules. (b) Pipeline for building the co-PS network. (c) Examples from the Co-PS network.  
683 Nodes are connected by edges at FDR < 1%. Heatmaps indicate presence of PS gene vs. cell  
684 lineage. The fatty acid synthesis cluster (orange) is selected for further analysis.

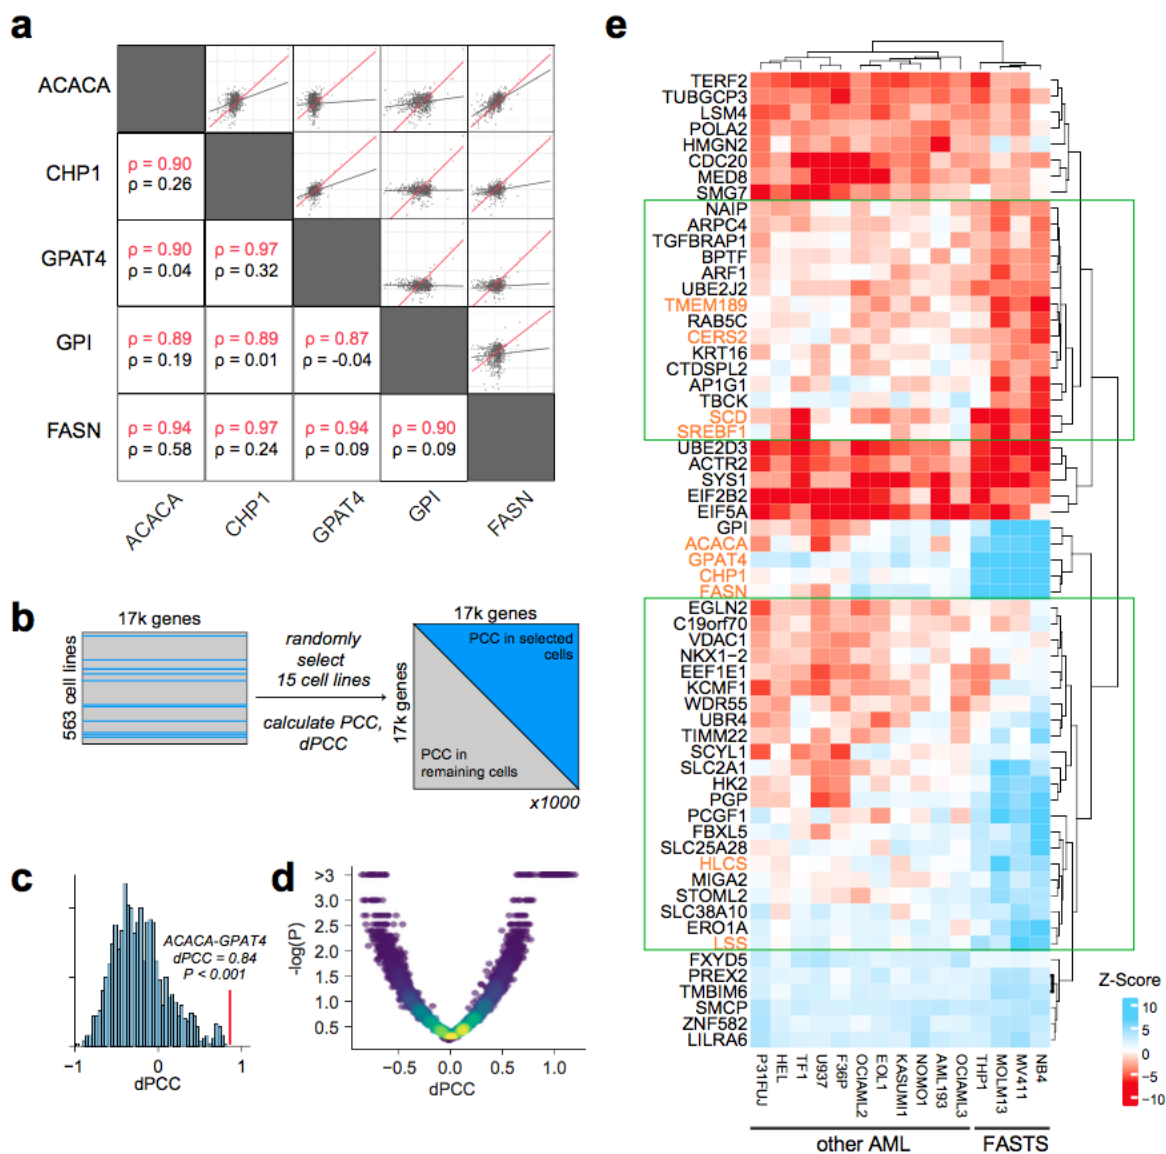

685  
 686  
 687  
 688 **Figure 3. Differential network analysis of fatty acid synthesis module.** (a) Among genes in  
 689 the FAS module, Pearson correlation coefficients of shuffled Z score profiles are substantially  
 690 higher in AML cells (red) than in other cells (gray). (b) Significance testing of differential PCC  
 691 (dPCC) involves building a null distribution by randomly selecting 15 cell lines, and calculating  
 692 PCC between all gene pairs in the selected cells and the remaining cells. (c) After 1,000  
 693 repeats, a null distribution is generated for each pair, and a P-value is calculated for the  
 694 observed AML-vs-other dPCC. (d) Volcano plot of dPCC vs. P-value. (e) Heatmap of shuffled Z  
 695 score for 15 AML cell lines vs. genes with  $P < 0.001$  and  $|Z| > 3$  in at least one AML cell line.

696 Clustering indicates the putative Fatty Acid Synthesis/Tumor Suppressor (FASTS) subtype.  
697 Green boxes indicate genes that are preferentially essential (top) or nonessential (bottom) in  
698 FASTS. Orange, genes involved in fatty acid and membrane biosynthesis.  
699

700

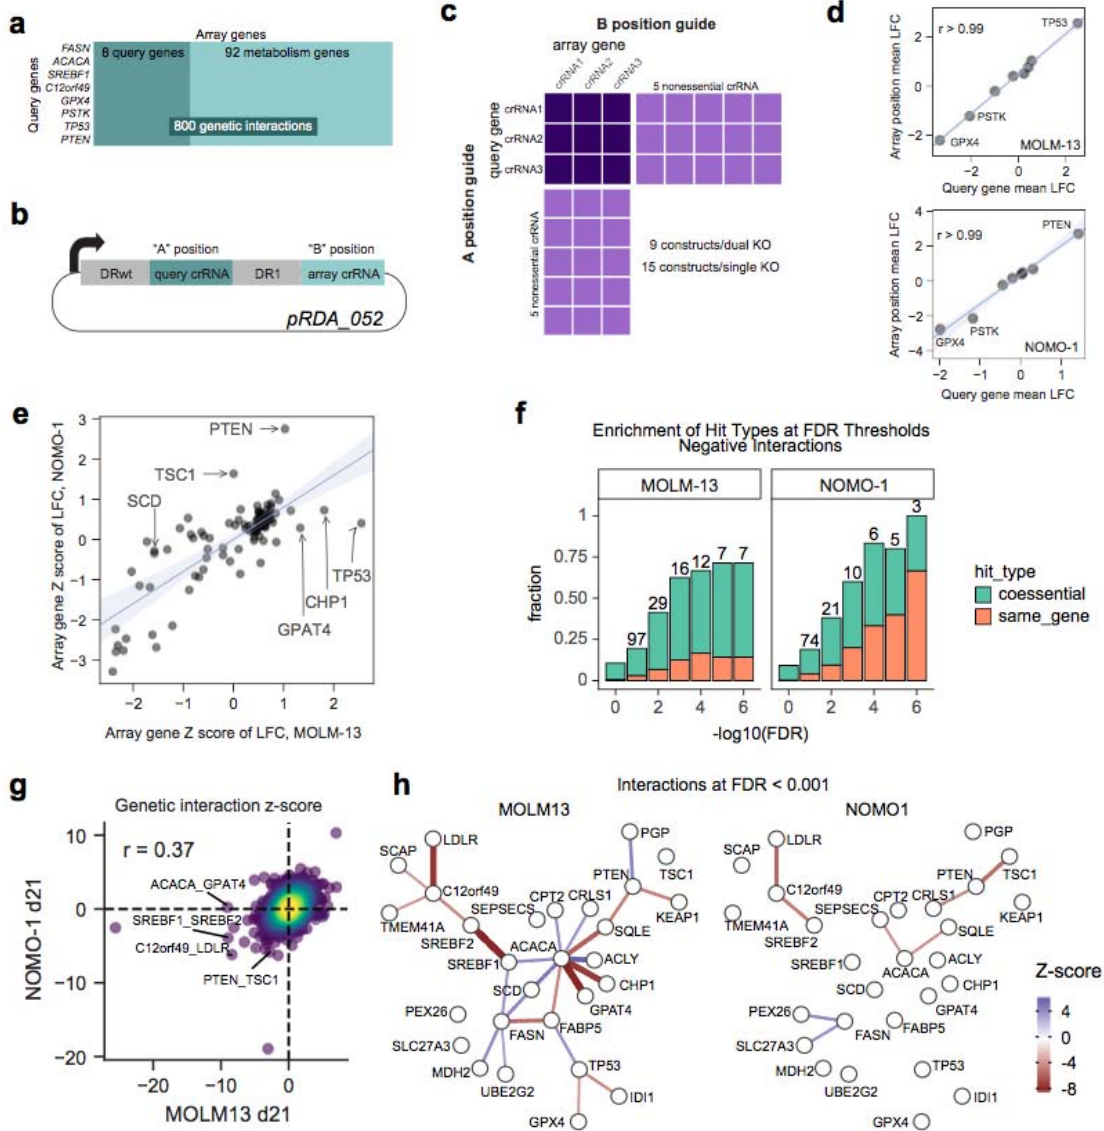

701

702

703

704 **Figure 4. Genetic interactions reveal a rewired lipid biosynthesis pathway in FASTS cells.**

705 (a) Genetic interaction screen targets 8 query genes and 100 array genes, for a total of 800

706 pairwise knockouts. (b) Library design uses a dual-guide enCa12a expression vector which

707 targets the query gene in the “A” position and array gene in the “B” position. (c) Overall library

708 design includes three crRNA/gene plus control crRNA targeting nonessential genes. Single-

709 knockout constructs (target gene paired with nonessential controls) allow accurate

710 measurement of single knockout fitness. (d) Considering single knockout fitness of query genes

711 in the “A” and “B” position of the crRNA expression vector shows no position effects in the two

712 cell lines screened (MOLM-13, NOMO-1). LFC, log fold change. (e) Single knockout fitness (Z-  
713 score of mean LFC) is highly consistent between MOLM-13 and NOMO-1, but reveals  
714 background-specific PS genes. (f) Enrichment among GI for coessential and same-gene genetic  
715 interactions. Same-gene interactions among genes that show single knockout fitness  
716 phenotypes are expected, reflecting quality of GI observations. (g) Global comparison of MOLM-  
717 13, NOMO-1 genetic interaction Z scores. (h) Network view of interactions in each background  
718 shows rewiring in MOLM-13 FASTS cells.  
719



720

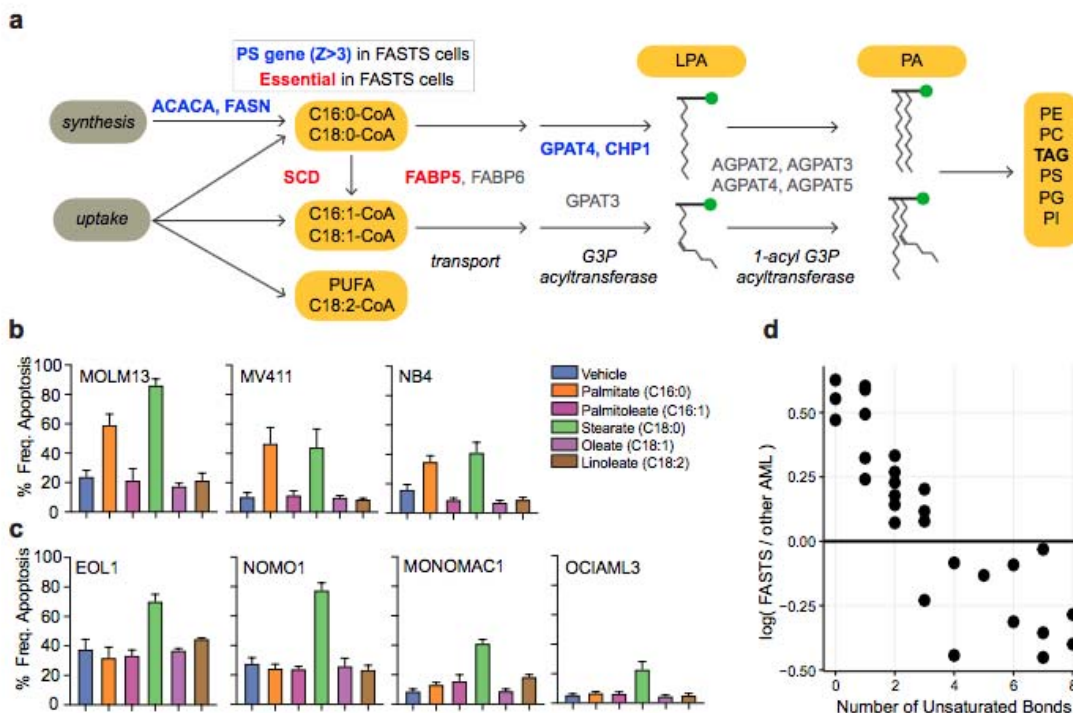

721

722

723

724 **Figure 5. FASTS cells are sensitive to saturated FA.** (a) Schematic of the fatty  
 725 acid/glycerolipid synthesis pathway. Blue, PS genes in FASTS cells. Red, essential genes.  
 726 Pathway analysis suggests saturated fatty acids are a critical node. (b) Apoptosis of FASTS  
 727 cells in response to media supplemented with 200  $\mu\text{m}$  fatty acids. All three cell lines show  
 728 marked sensitivity to palmitate. (c) Apoptosis of other AML cells in response to fatty acids shows  
 729 no response to palmitate. (d) Triacylglycerol (TAG) species metabolite differences. The x axis  
 730 represents the median difference of log<sub>10</sub> normalized peak area of the metabolite in FASTS  
 731 cells vs all other AML cells. The y axis represents the number of saturated bonds present. Each  
 732 dot represents a unique metabolite.

733



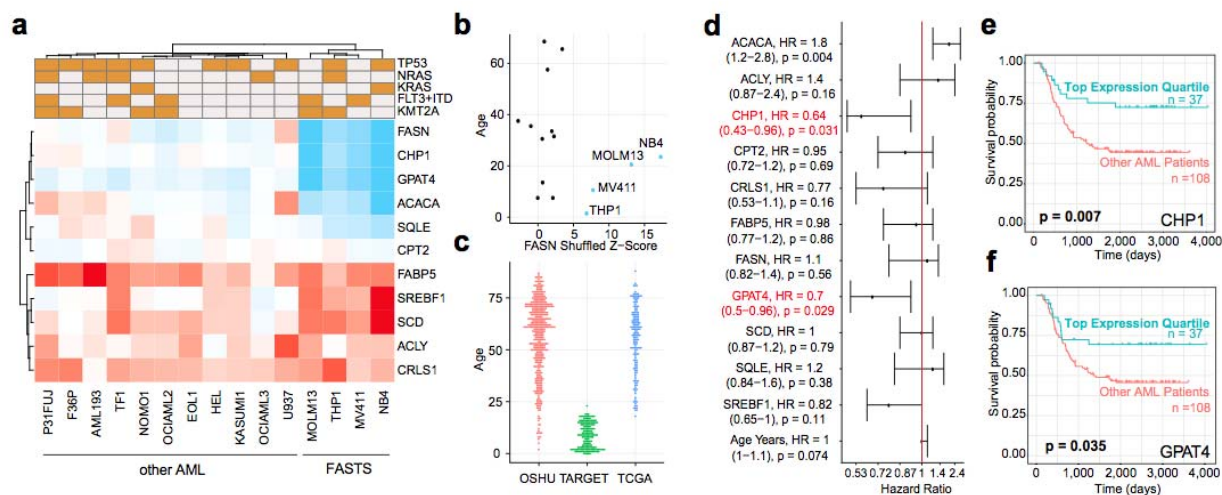

734  
735  
736  
737  
738  
739  
740  
741  
742  
743  
744

**Figure 6. Prognostic signature of FASTS module.** (a) Heatmap of shuffled Z scores for genes implicated in the genetic interaction network. Top, common AML lesions. (b) Shuffled Z-score of FASN in AML cell lines vs. age of patient from which cell lines were derived. Blue, FASTS cells. (c) Age distribution of AML patients in three genomics cohorts. (d) Hazard ratios (95% CI; univariate Cox proportional hazards test) for expression of genes in (a), using genomics and survival data from TARGET. (e) Kaplan-Meier survival analysis of AML patients in TARGET, comparing top quartile of *CHP1* expression vs. others. (f) Same, with *GPAT4*.
